# Supplementary material for: Labelling kelps with 13 C and 15 N for isotope tracing or enrichment experiments
Source: publisher site journal article supplement (doi:10.1515/bot-2025-0029), 2025-09-08
Supplement: Supplementary file 1 [file j_bot-2025-0029_suppl_004.xlsx]

## Sheet: L. digi WW
Table S3: Laminaria digitata growth rate measurements
Wet_weight(g)	Area(cm2)	Number_sporophytes	Replicate_ID	Day	Species
0.0629	5.43	2	L1.2	0	L. digitata
0.0512	4.041	2	L2.2	0	L. digitata
0.0444	3.679	2	L3.2	0	L. digitata
0.0822	6.55	2	L1.2	4	L. digitata
0.0606	4.977	2	L2.2	4	L. digitata
0.057	5.152	2	L3.2	4	L. digitata
0.0973	n.a.	2	L1.2	8	L. digitata
0.073	n.a.	2	L2.2	8	L. digitata
0.0721	n.a.	2	L3.2	8	L. digitata
0.1725	9.011	2	L1.2	14	L. digitata
0.107	6.965	2	L2.2	14	L. digitata
0.1184	7.404	2	L3.2	14	L. digitata
